# Supplementary material
Source: PubMed Central journal article supplement (PMC7079728)

Figure S3:  
Goodness of Fit  
Plots for TDF,  
TAF, and FTC

Goodness of Fit  
Plots for Tenofovir  
Disoproxil  
Fumarate (TDF)

Individual Concentration vs. Time Plots (TDF)

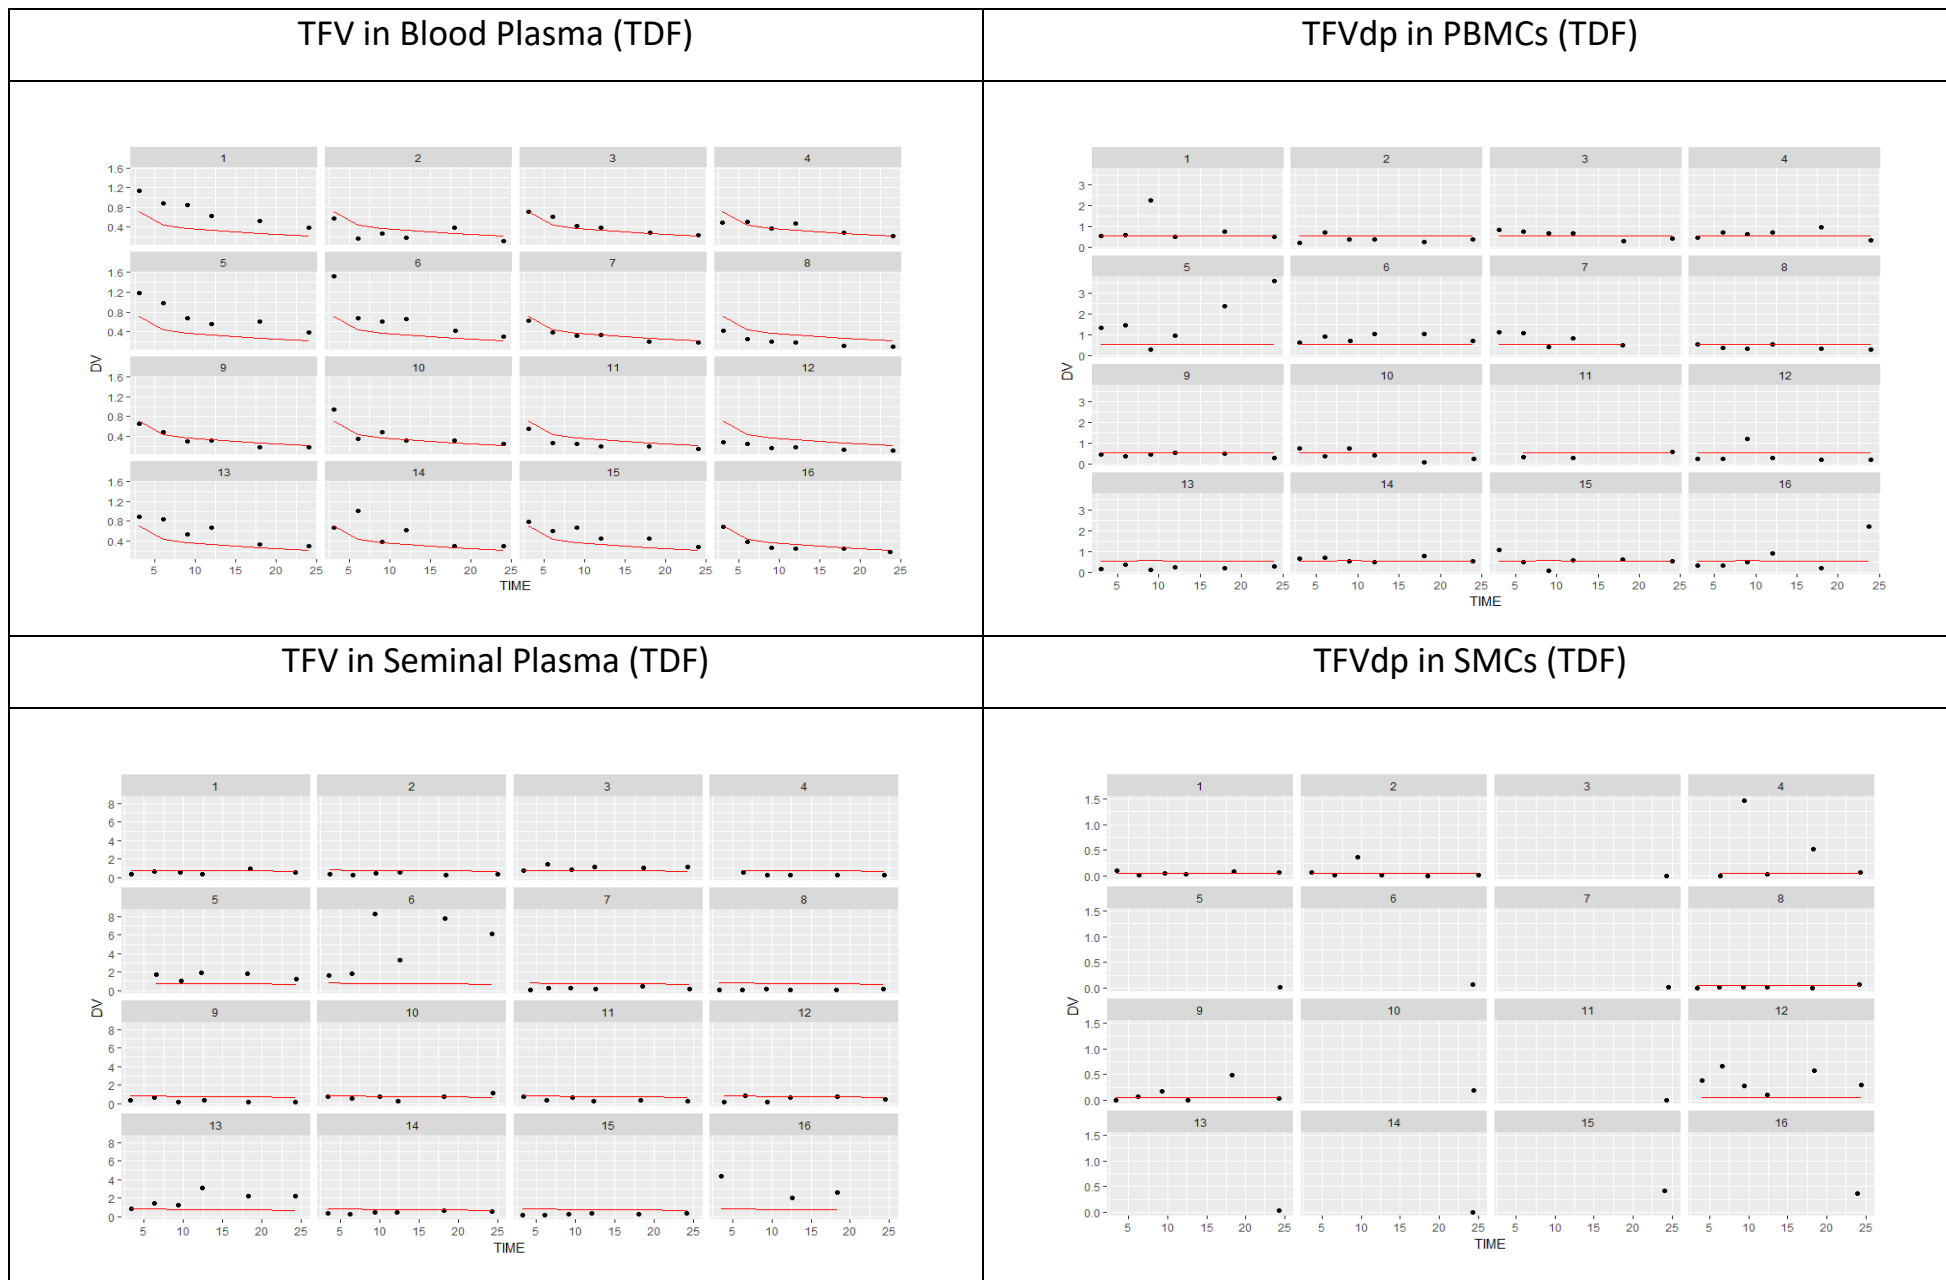

# TFV in Blood Plasma (TDF)

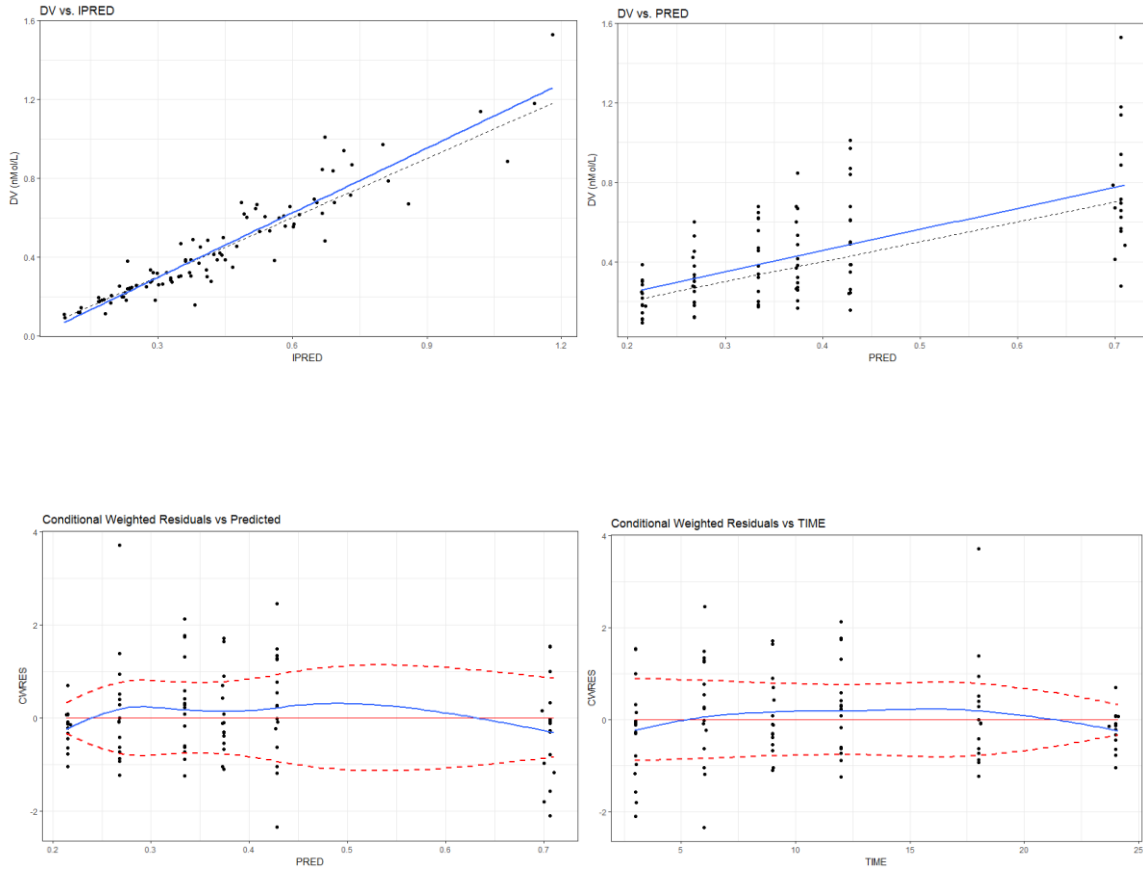

# TFVdp in PBMCs (TDF)

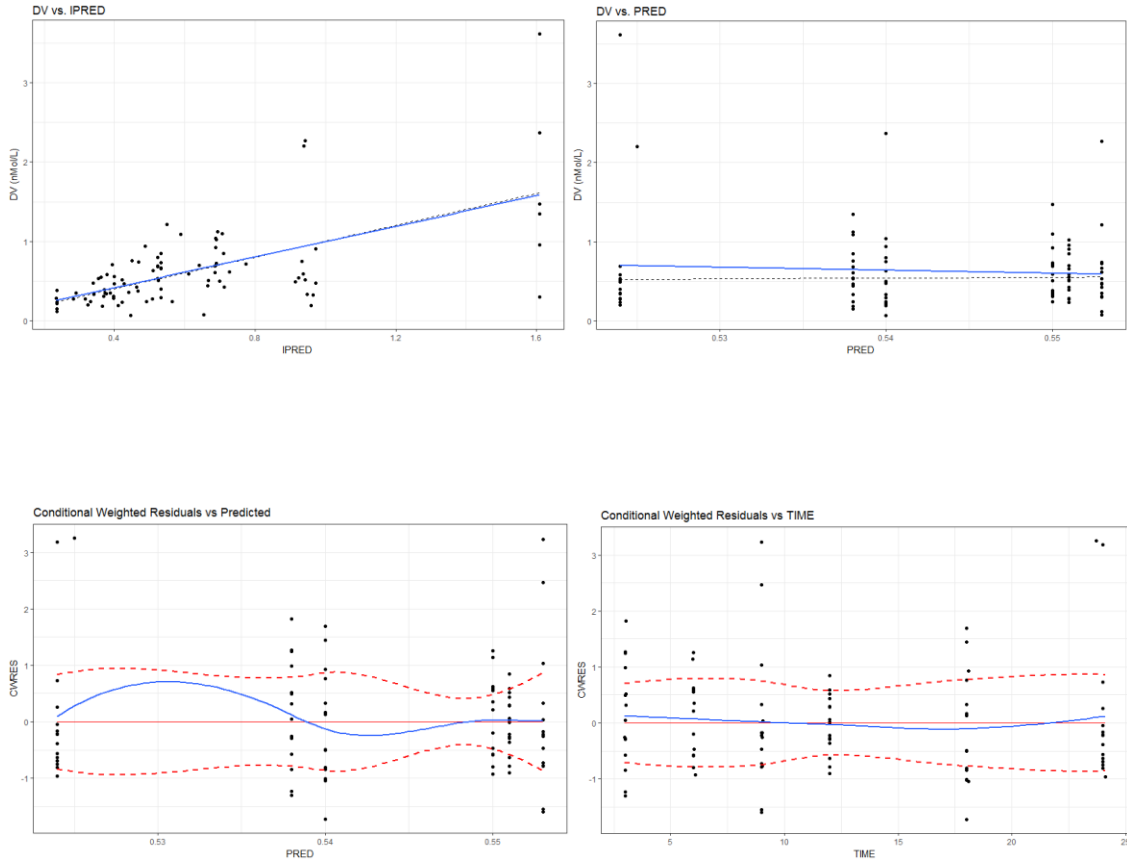

# TFV in Seminal Plasma (TDF)

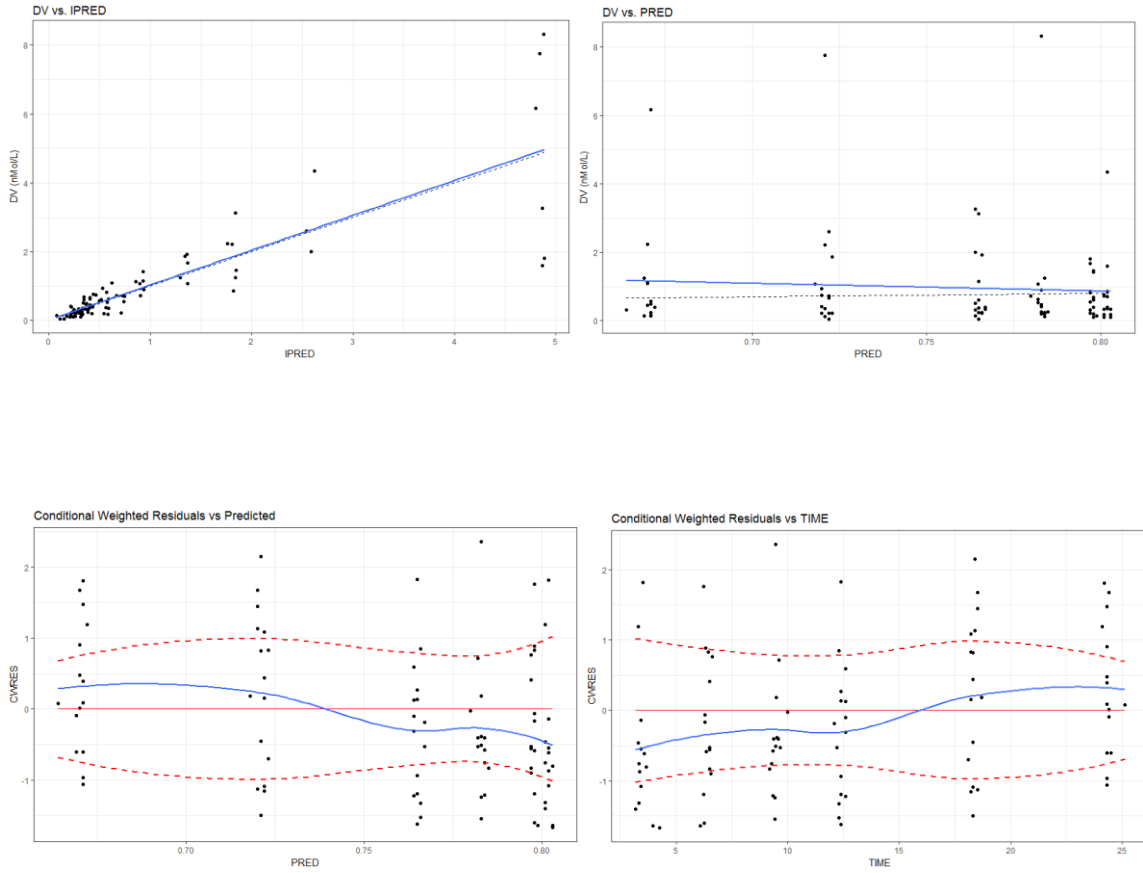

# TFVdp in SMCs (TDF)

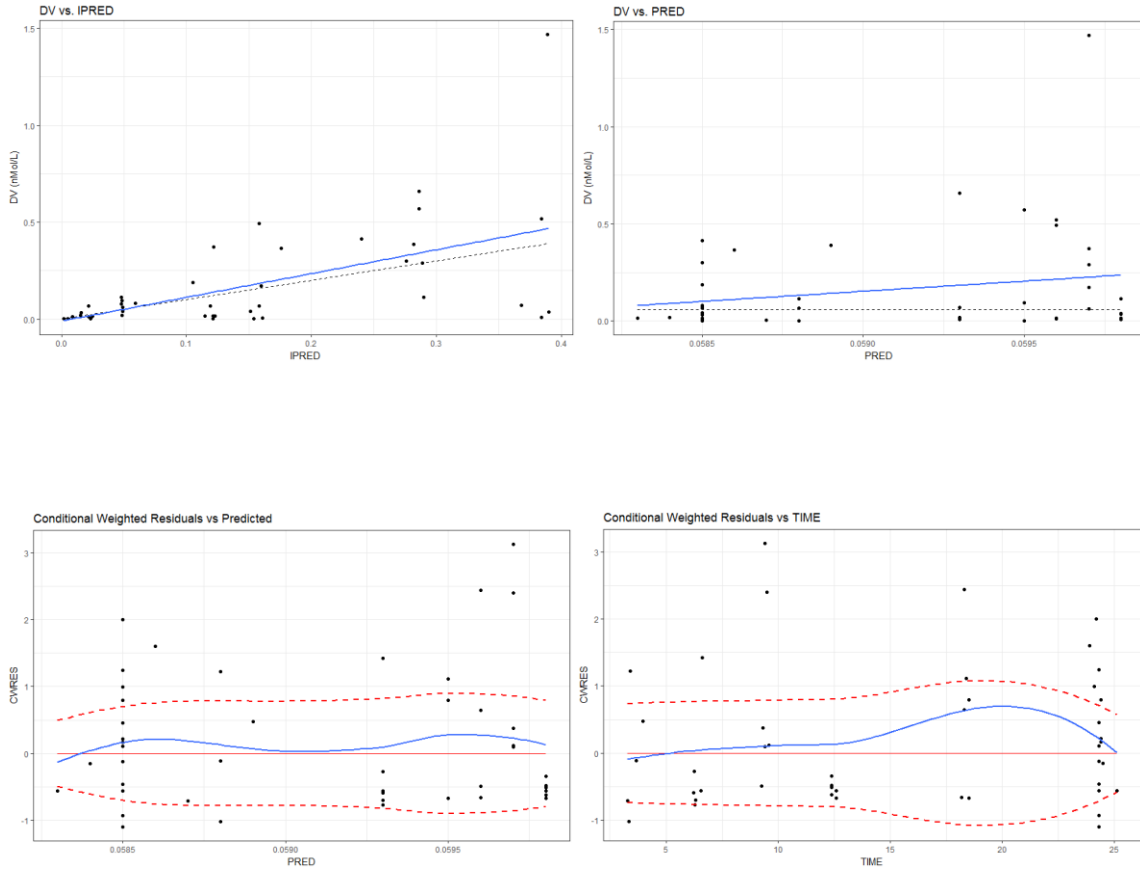

# Goodness of Fit Plots for Emtricitabine (FTC)



## Individual Concentration vs. Time Plots (FTC)

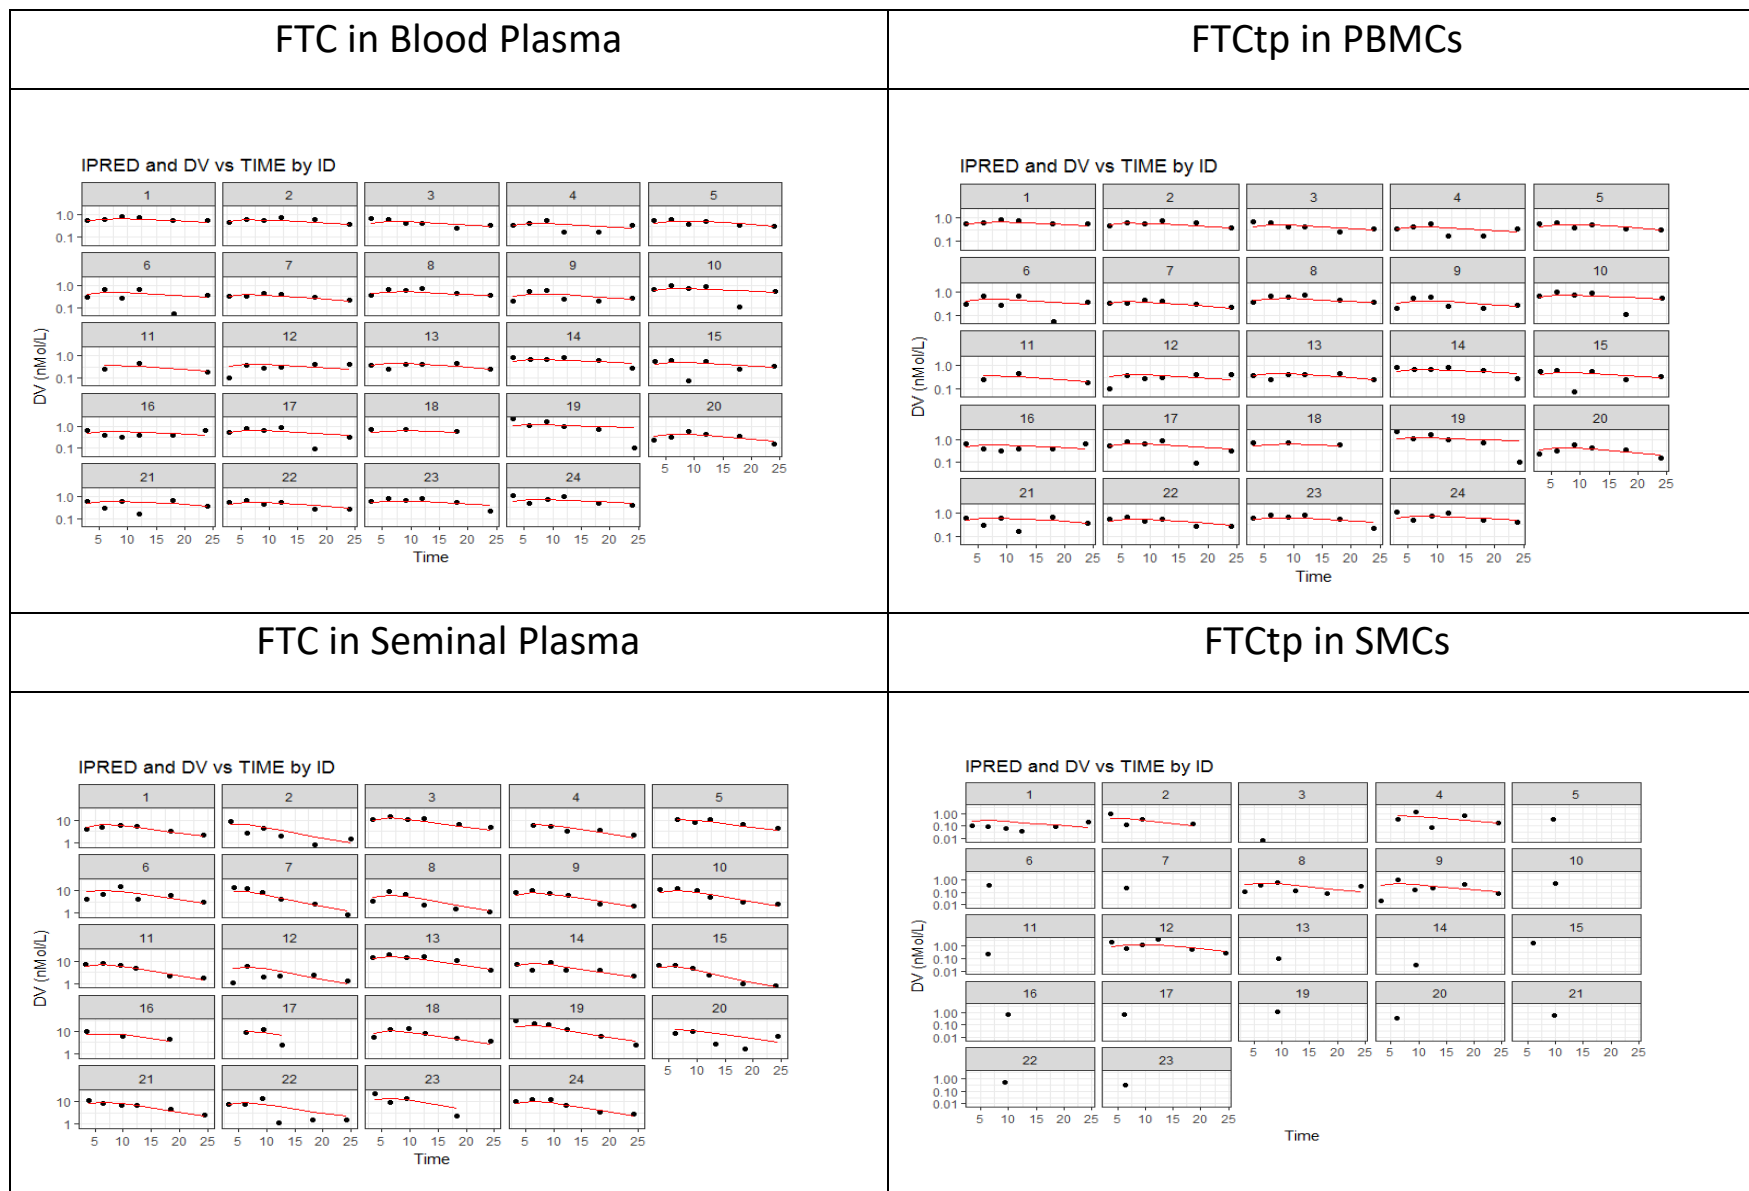

## FTC in Blood Plasma

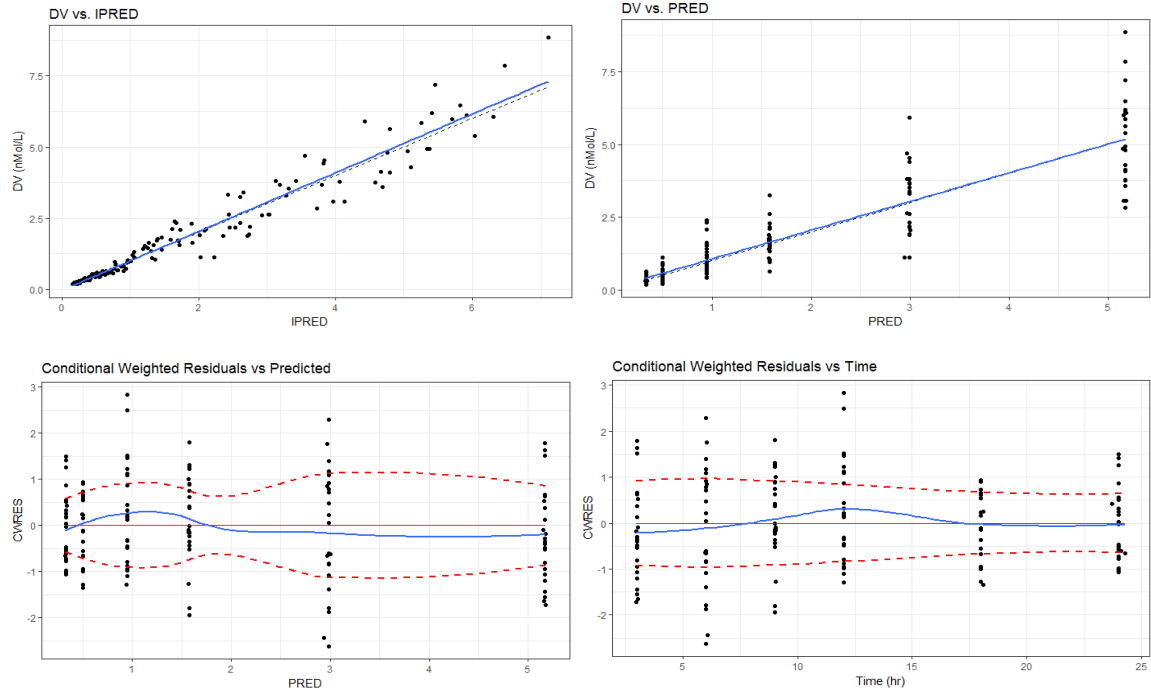

# FTCtp in PBMCs

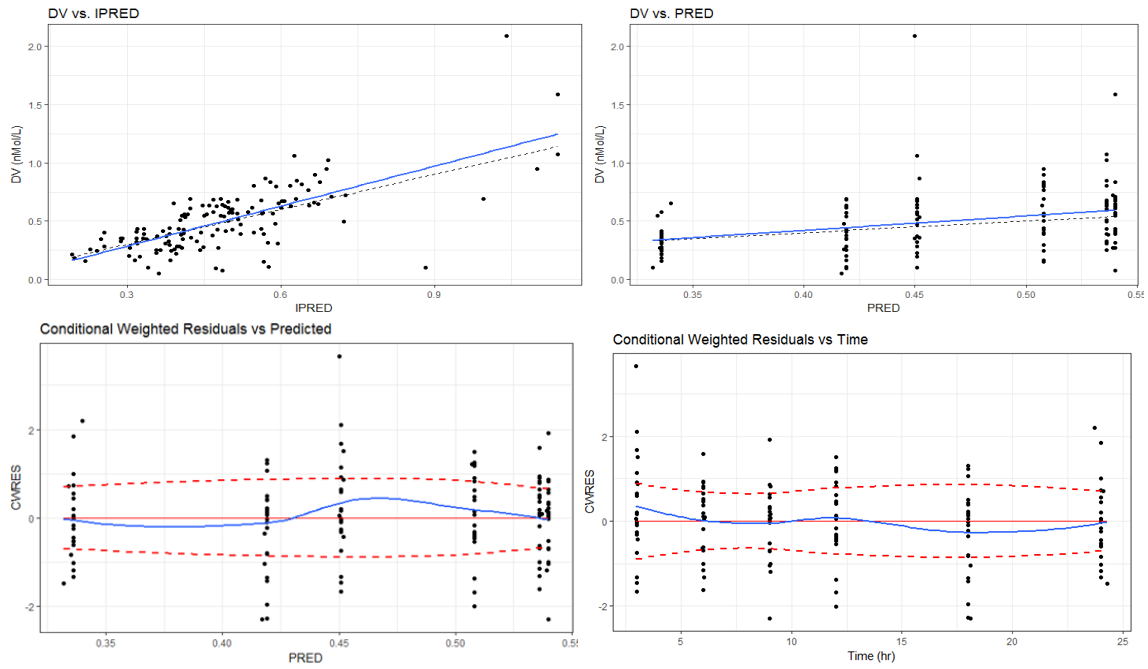

# FTC in Seminal Plasma

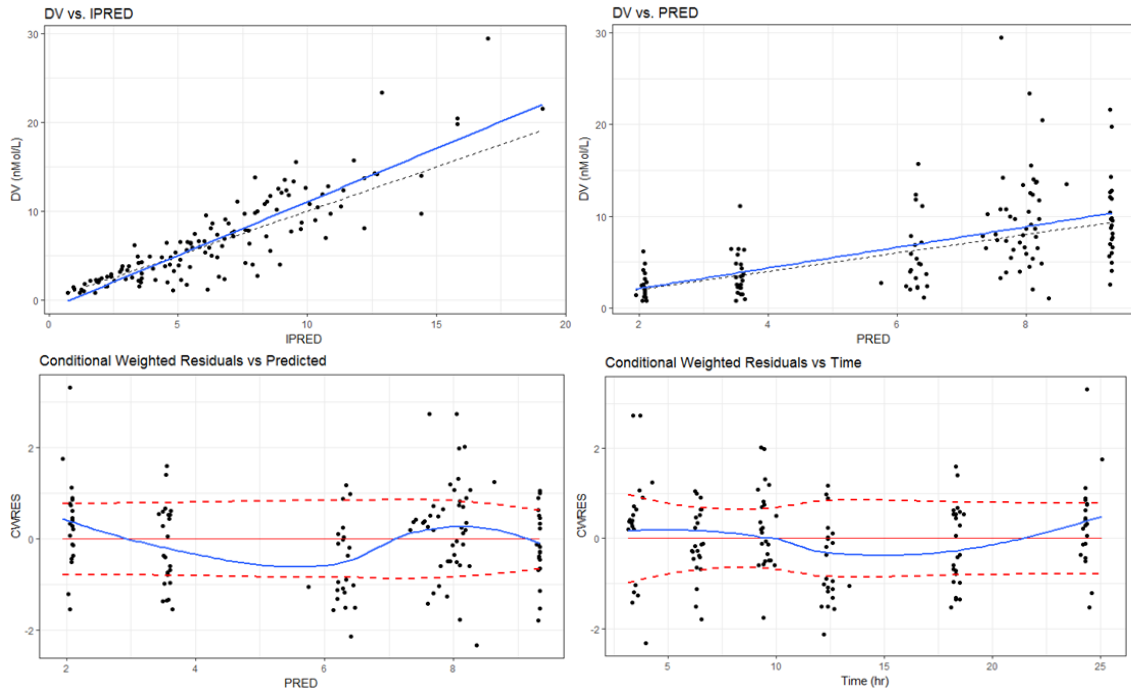

# FTCtp in SMCs

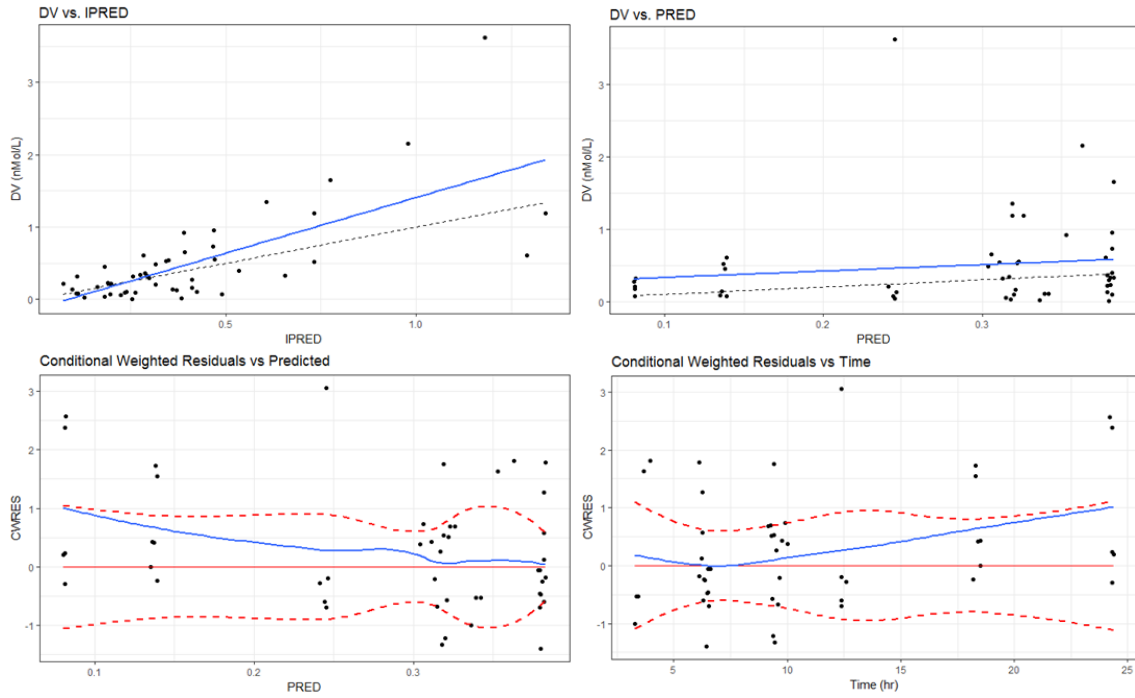

# Goodness of Fit Plots for Tenofovir Alafenamide (TAF)

## TAF in Blood Plasma

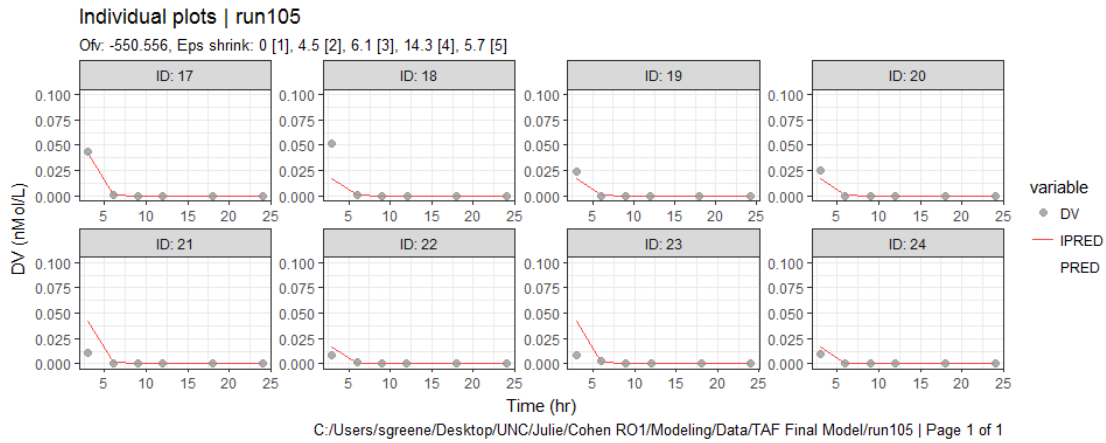

## TFVdp in PBMCs

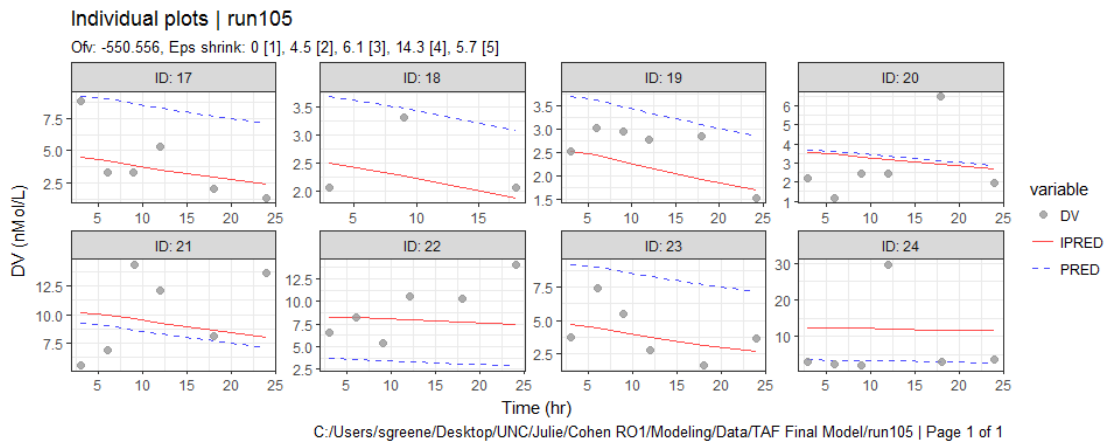

## TFV in Blood Plasma

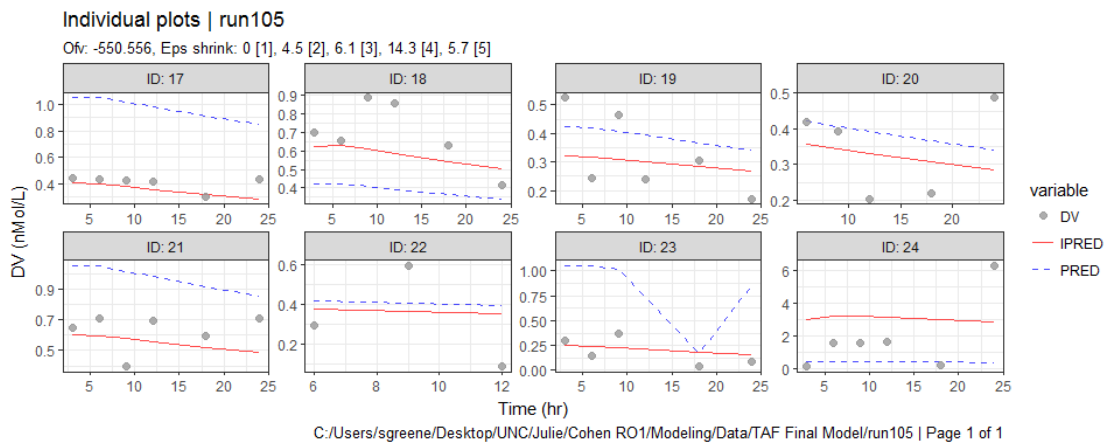

## TAF in Seminal Plasma

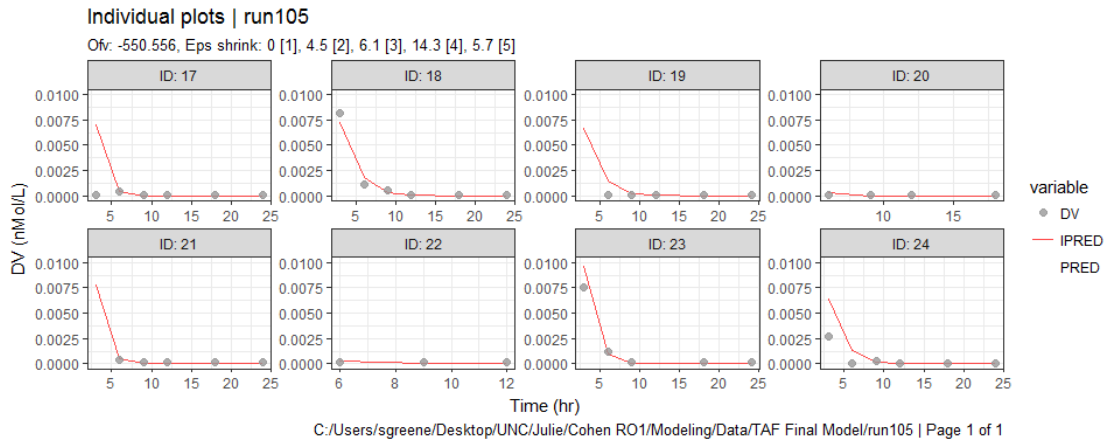

## TFV in Seminal Plasma

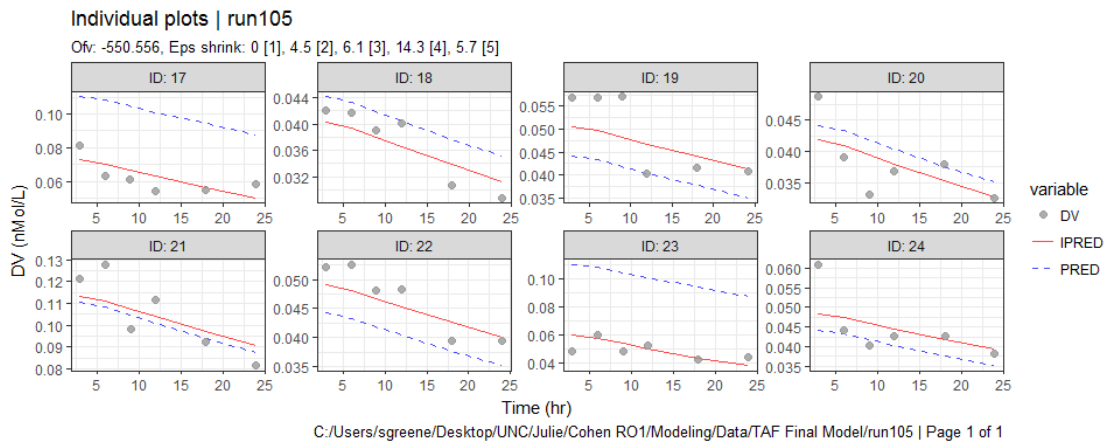



# TAF in Blood Plasma

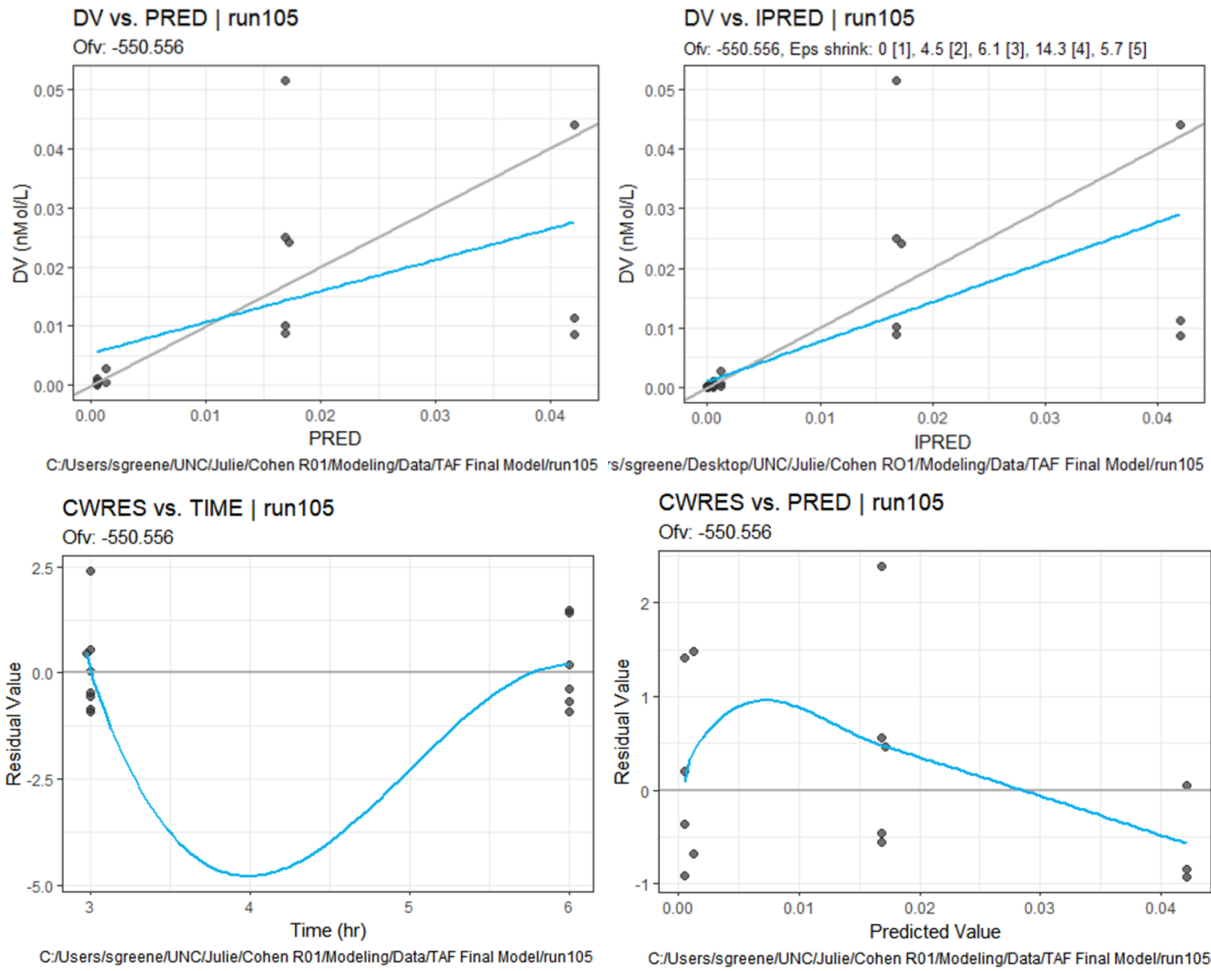

# TFVdp in PBMCs

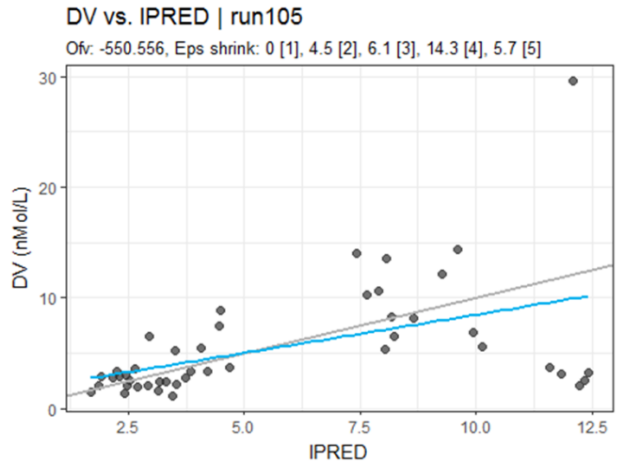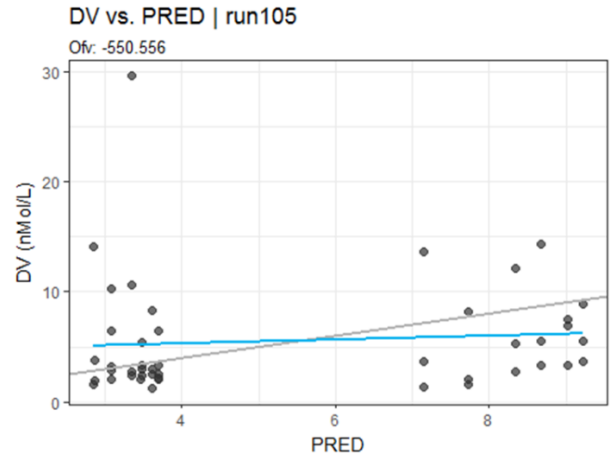

's/sgreene/Desktop/UNC/Julie/Cohen RO1/Modeling/Data/TAF Final Model/run105 's/sgreene/Desktop/UNC/Julie/Cohen RO1/Modeling/Data/TAF Final Model/run105

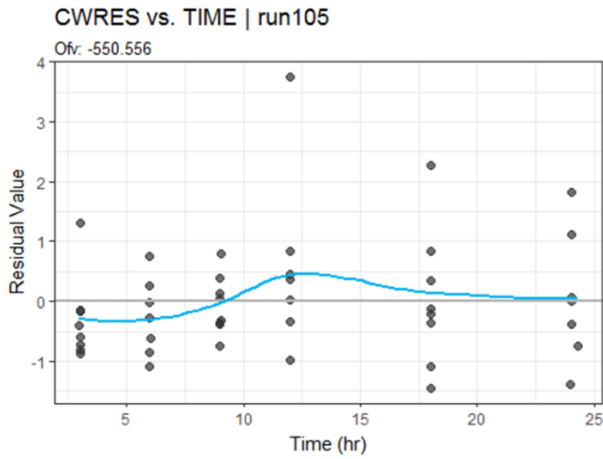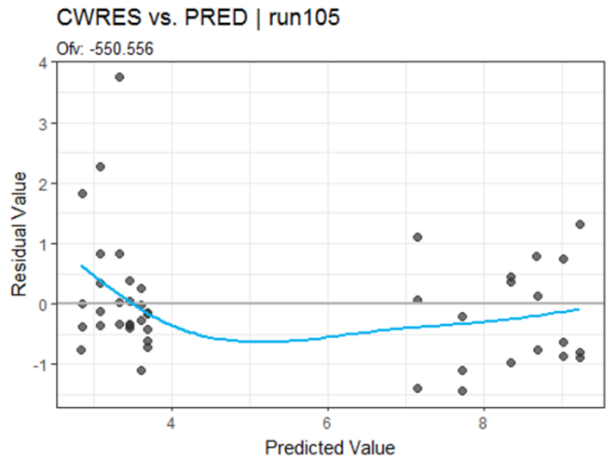

's/sgreene/Desktop/UNC/Julie/Cohen RO1/Modeling/Data/TAF Final Model/run105 's/sgreene/Desktop/UNC/Julie/Cohen RO1/Modeling/Data/TAF Final Model/run105

# TFV in Blood Plasma

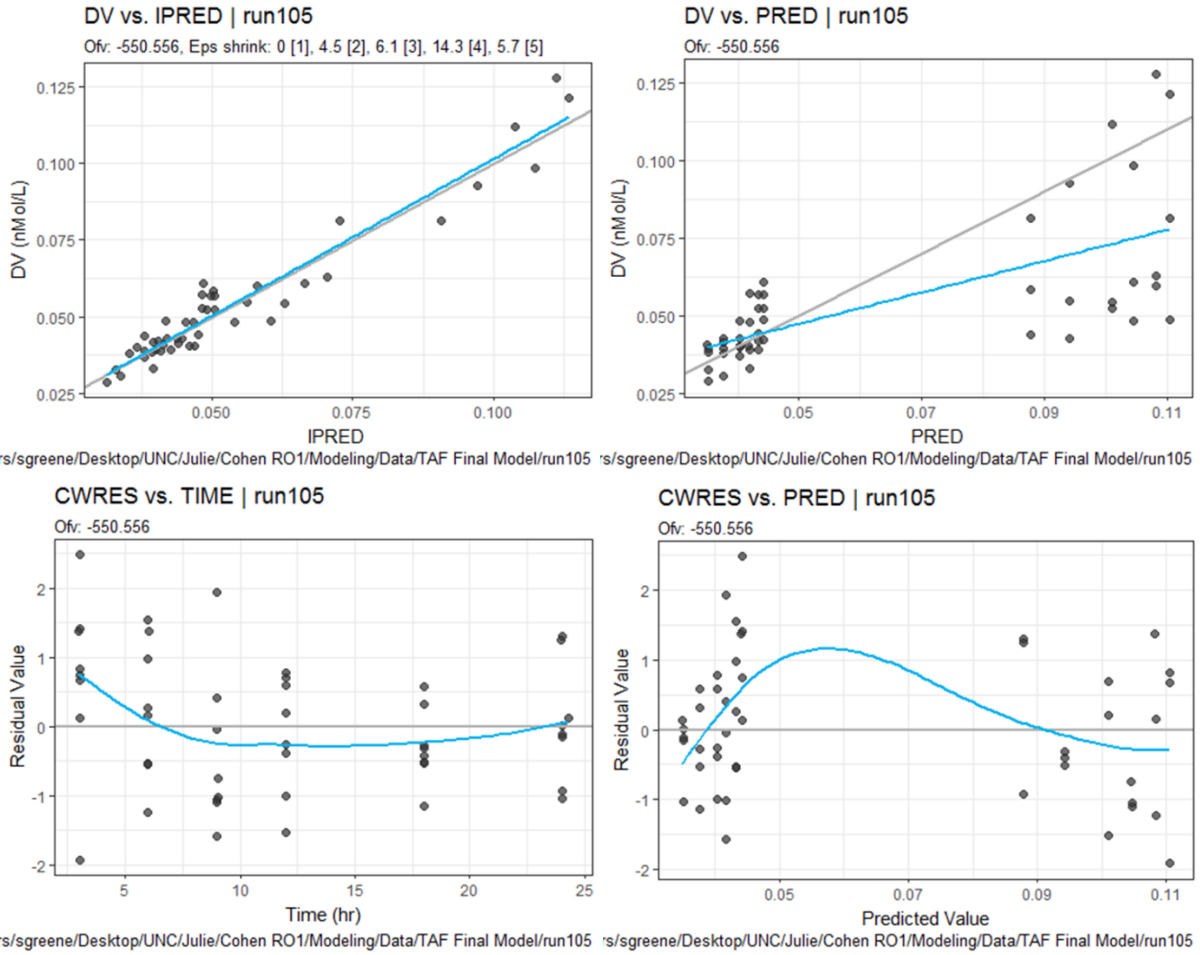

# TAF in Seminal Plasma

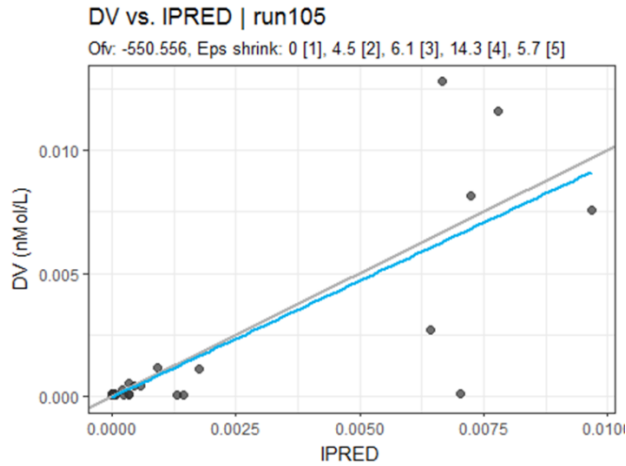

C:/Users/sgreene/Desktop/UNC/Julie/Cohen R01/Modeling/Data/TAF Final Model/run105

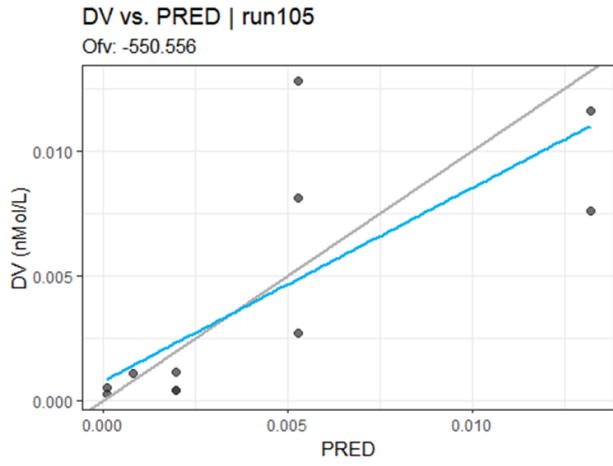

C:/Users/sgreene/UNC/Julie/Cohen R01/Modeling/Data/TAF Final Model/run105

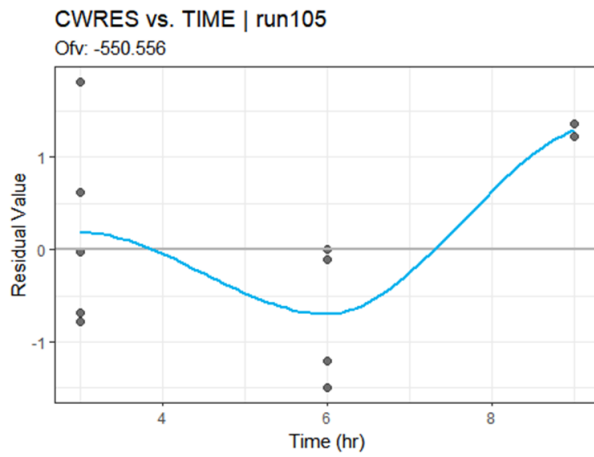

C:/Users/sgreene/UNC/Julie/Cohen R01/Modeling/Data/TAF Final Model/run105

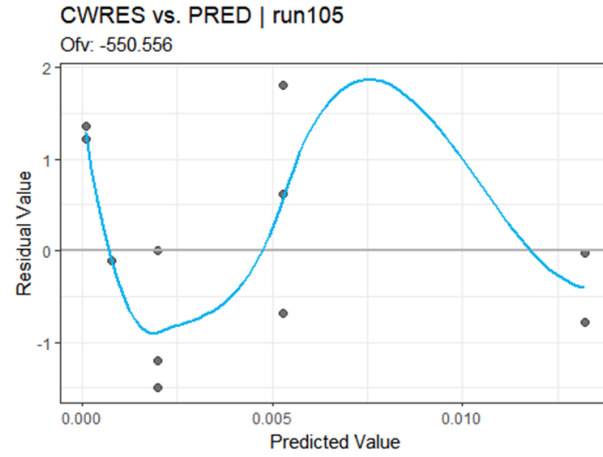

C:/Users/sgreene/UNC/Julie/Cohen R01/Modeling/Data/TAF Final Model/run105

# TFV in Seminal Plasma

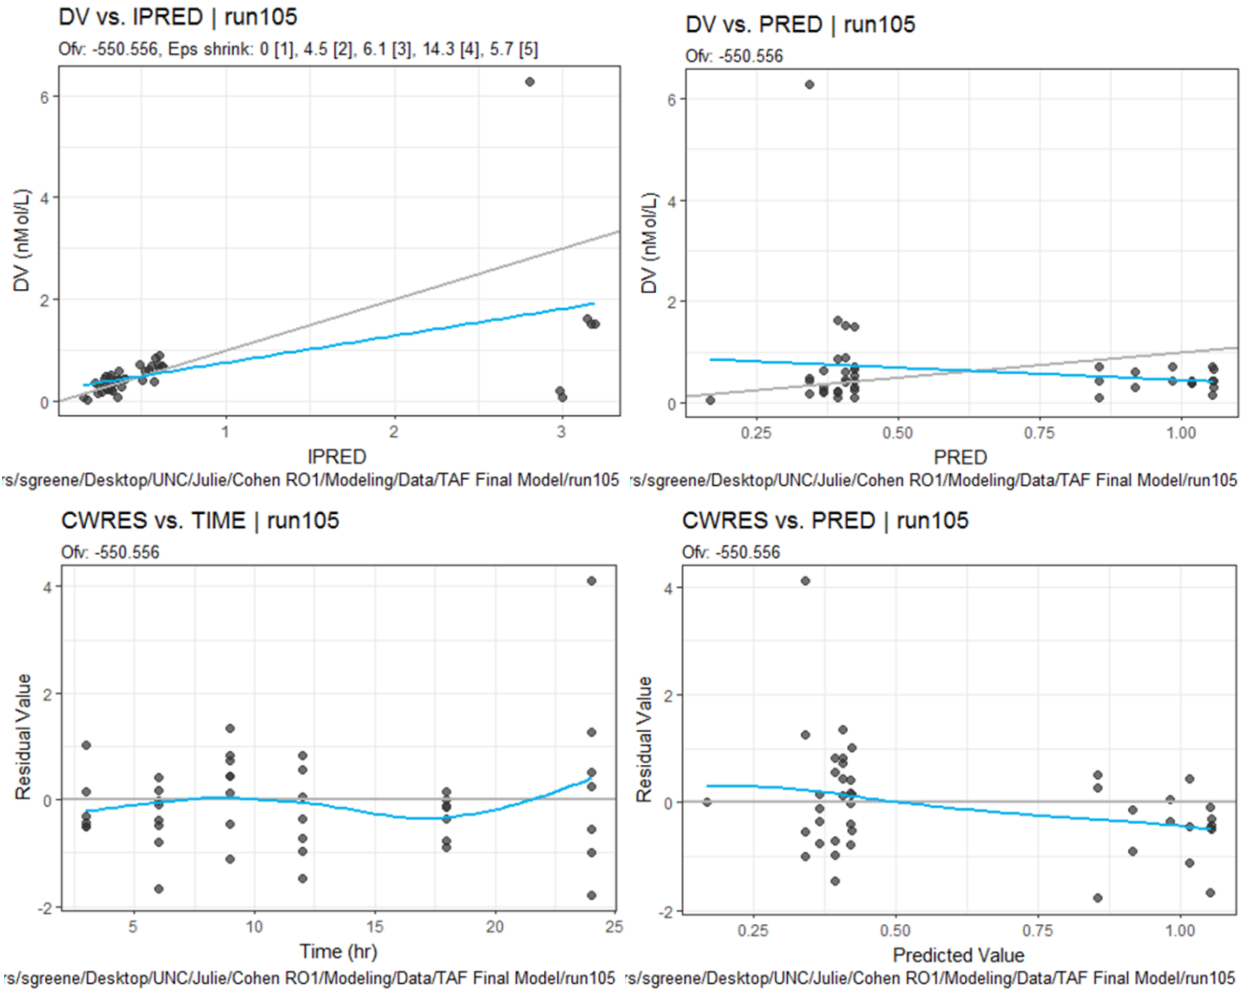

Supplement: NIHMS1552535-supplement-Figure_S3.pdf [file NIHMS1552535-supplement-Figure_S3.pdf]
