# Supplementary material
Source: PubMed Central journal article supplement (PMC7079728)
Supplement: NIHMS1552535-supplement-Figure_S1.pdf [file NIHMS1552535-supplement-Figure_S1.pdf]

**Figure S1. Population Pharmacokinetic Estimates for Emtricitabine (FTC)**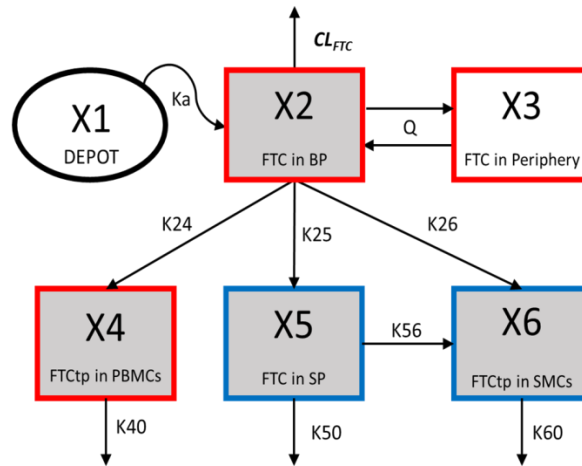

Red boxes = blood matrices (BP/PBMCs), blue boxes = seminal matrices (SP/SMCs), gray boxes = compartments with direct measurement, ovals = depot compartments
