# Supplementary material
Source: PubMed Central journal article supplement (PMC7079728)
Supplement: NIHMS1552535-supplement-Figure_S2.pdf [file NIHMS1552535-supplement-Figure_S2.pdf]

**Figure S2. Visual Predictive Checks for Emtricitabine (FTC)**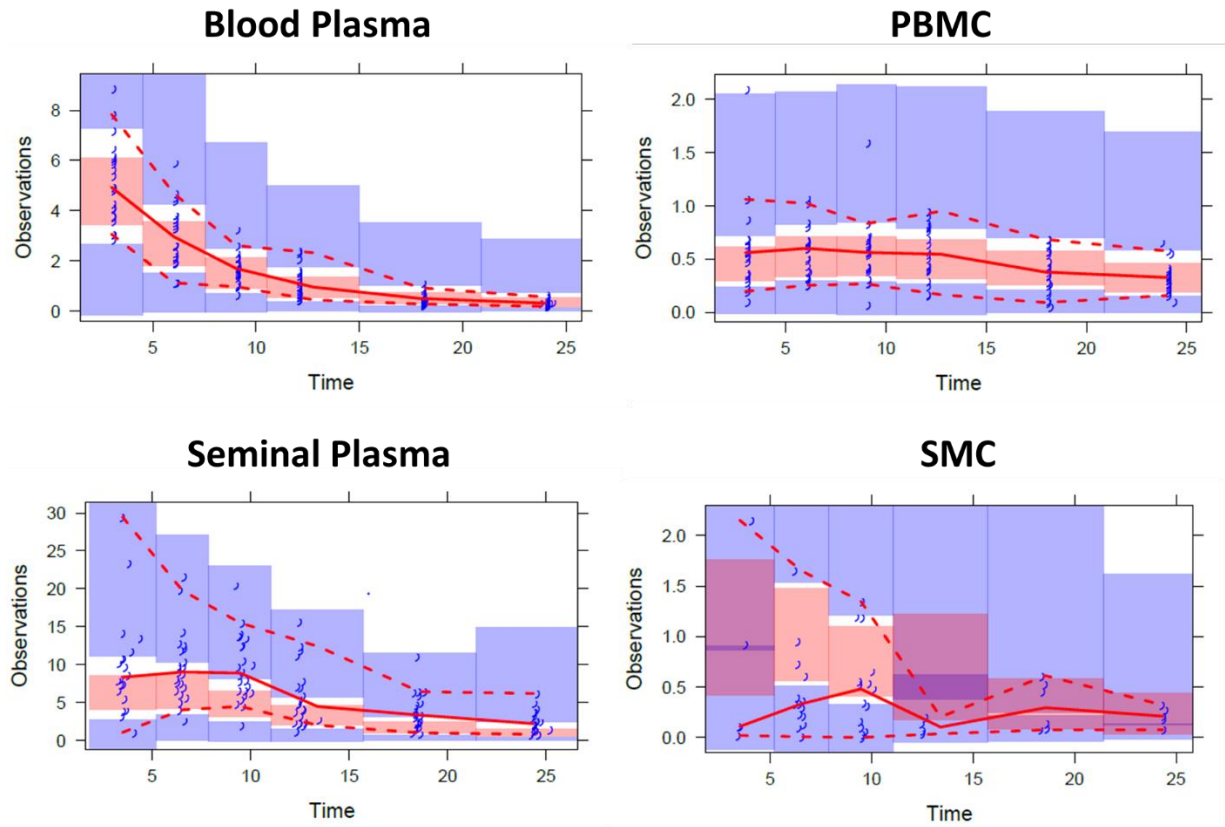

Blue markers = observed data, red dashed lines = predicted 5<sup>th</sup> and 95<sup>th</sup> prediction lines, red solid line = median prediction line, red and blue shaded regions = 95% confidence intervals
