# Supplementary material
Source: PubMed Central journal article supplement (PMC7079728)
Supplement: NIHMS1552535-supplement-Table_S1.pdf [file NIHMS1552535-supplement-Table_S1.pdf]

**Table S1. Population Pharmacokinetic Estimates for Emtricitabine (FTC)**

| Parameter (units)       | Final NONMEM Estimate | Median Bootstrap Estimate | Bootstrap 95% CI   | %RSE  |
|-------------------------|-----------------------|---------------------------|--------------------|-------|
| Ka (hr <sup>-1</sup> )* | 0.6                   | 0.6                       | --                 | --    |
| CL/F (L/hr)             | 10.6                  | 10.6                      | (9.39 – 11.9)      | 2.32% |
| V/F (L)                 | 41.3                  | 41.7                      | (33.0 – 49.4)      | 4.51% |
| Q/F (L/hr)              | 3.79                  | 3.76                      | (3.04 – 4.58)      | 3.96% |
| V2/F (L)                | 43.1                  | 43.0                      | (34.4 – 55.9)      | 5.19% |
| K24 (hr <sup>-1</sup> ) | 0.0133                | 0.0134                    | (0.00862 – 0.0175) | 6.51% |
| K40 (hr <sup>-1</sup> ) | 0.0513                | 0.0521                    | (0.0342 – 0.0674)  | 6.47% |
| K25 (hr <sup>-1</sup> ) | 0.543                 | 0.560                     | (0.410 – 0.739)    | 5.95% |
| K50 (hr <sup>-1</sup> ) | 0.109                 | 0.140                     | (0.00180 – 0.215)  | 14.6% |
| K26 (hr <sup>-1</sup> ) | 0.0399                | 0.0188                    | (0.00100 – 0.127)  | 112%  |
| K56 (hr <sup>-1</sup> ) | 0.0604                | 0.0345                    | (0.00100 – 0.159)  | 49.3% |
| K60 (hr <sup>-1</sup> ) | 1.80                  | 1.25                      | (0.0263 – 4.83)    | 48.1% |
| $\omega$ on CL/F (%CV)  | 21.5%                 | 20.8%                     | (14.8% - 28.8%)    | 15.3% |
| CL-V correlation        | 0.0283                | 0.0236                    | (-0.0113 – 0.0943) | 46.7% |
| $\omega$ on V/F (%CV)   | 28.2%                 | 26.6%                     | (13.6% - 46.8%)    | 101%  |
| $\omega$ on K40 (%CV)   | 27.8%                 | 26.3%                     | (15.1% - 36.6%)    | 16.5% |
| $\omega$ on K25 (%CV)   | 29.6%                 | 28.3%                     | (1.92% - 40.3%)    | 20.5% |
| $\omega$ on K50 (%CV)   | 23.9%                 | 26.9%                     | (0.0300% - 68.7%)  | 413%  |
| $\omega$ on K60 (%CV)   | 78.1%                 | 73.3%                     | (1.23% - 190%)     | 183%  |
| $\sigma$ on BP (%CV)    | 19.8%                 | 19.6%                     | (17.1% - 21.7%)    | 4.56% |
| $\sigma$ on PBMC (%CV)  | 36.2%                 | 35.9%                     | (31.3% - 40.1%)    | 4.97% |
| $\sigma$ on SP (%CV)    | 36.6%                 | 36.1%                     | (28.9% - 42.7%)    | 7.62% |
| $\sigma$ on SMC (%CV)   | 88.9%                 | 82.2%                     | (68.4% - 95.0%)    | 6.32% |

\* Fixed Parameter

95% CI - 95% Confidence Interval of bootstrap estimate

%RSE – Relative Standard Error in Percentage Terms

 $\omega$  – Interindividual Variability $\sigma$  – Residual Variability

%CV – Coefficient of Variation in Percentage Terms
